# Supplementary material for: Carboxylic acid and metal ion co-driven assembly of triene coordination polymers for [2 + 2] photocycloaddition
Source: Royal Society of Chemistry journal article supplement (doi:10.1039/d3qi00748k), 2023-01-01
Supplement: d3qi00748k1.pdf [file d3qi00748k1.pdf]

## Electronic Supplementary Information

### Carboxylic acids and metal ions co-driven assembly of triene coordination polymers for [2+2] photocycloaddition

Xin-Ran Xue,<sup>a,b</sup> Chen Cao,<sup>a</sup> Yu Ge,<sup>a</sup> Qiu-Yi Li,<sup>a</sup> Min-Jie Zhang,<sup>a</sup> Qi Liu<sup>\*a</sup> and Jian-Ping Lang<sup>\*a,b</sup>

<sup>a</sup> College of Chemistry, Chemical Engineering and Materials, Soochow University, Suzhou 215123, Jiangsu, People's Republic of China.

<sup>b</sup> State Key Laboratory of Organometallic Chemistry, Shanghai Institute of Organic Chemistry, Chinese Academy of Sciences, Shanghai 200032, People's Republic of China.

\* Corresponding author.

E-mail: [jplang@suda.edu.cn](mailto:jplang@suda.edu.cn); [qi.liu@suda.edu.cn](mailto:qi.liu@suda.edu.cn)

## Table of contents

|                                                                                                                                                                                                                                                                                                                                                                                                                                                                                  |     |
|----------------------------------------------------------------------------------------------------------------------------------------------------------------------------------------------------------------------------------------------------------------------------------------------------------------------------------------------------------------------------------------------------------------------------------------------------------------------------------|-----|
| <b>Experimental</b> .....                                                                                                                                                                                                                                                                                                                                                                                                                                                        | S4  |
| <b>1. General methods and procedures</b> .....                                                                                                                                                                                                                                                                                                                                                                                                                                   | S4  |
| <b>2. Synthesis</b> .....                                                                                                                                                                                                                                                                                                                                                                                                                                                        | S4  |
| 2.1 Synthesis of 1,3,5-tri-4-pyridyl-1,2-ethenylbenzene (tpeb).....                                                                                                                                                                                                                                                                                                                                                                                                              | S4  |
| 2.2 Synthesis of $\{[\text{Zn}(1,2\text{-chdc})(\text{tpeb})]\cdot\text{H}_2\text{O}\}_n$ ( <b>CP1</b> ).....                                                                                                                                                                                                                                                                                                                                                                    | S4  |
| 2.3 Synthesis of $\{[\text{Zn}(1,3\text{-chdc})(\text{tpeb})]\cdot\text{H}_2\text{O}\}_n$ ( <b>CP2</b> ).....                                                                                                                                                                                                                                                                                                                                                                    | S5  |
| 2.4 Synthesis of $[\text{Zn}(1,4\text{-chdc})(\text{tpeb})]_n$ ( <b>CP3</b> ).....                                                                                                                                                                                                                                                                                                                                                                                               | S5  |
| 2.5 Synthesis of $\{[\text{Cd}_2(1,2\text{-chdc})(1,2\text{-Hchdc})(\text{H}_2\text{O})(\text{tpeb})_2]\cdot(\text{NO}_3)(\text{H}_2\text{O})\}_n$ ( <b>CP4</b> ).....                                                                                                                                                                                                                                                                                                           | S5  |
| 2.6 Synthesis of $[\text{Cd}(1,3\text{-chdc})(\text{tpeb})]_n$ ( <b>CP5</b> ).....                                                                                                                                                                                                                                                                                                                                                                                               | S5  |
| 2.7 Synthesis of $[\text{Cd}(1,4\text{-chdc})(\text{tpeb})]_n$ ( <b>CP6</b> ).....                                                                                                                                                                                                                                                                                                                                                                                               | S5  |
| 2.8 Synthesis of <b>CP2a-CP6a</b> .....                                                                                                                                                                                                                                                                                                                                                                                                                                          | S6  |
| 2.9 Photocurrent response measurements.....                                                                                                                                                                                                                                                                                                                                                                                                                                      | S6  |
| <b>3. X-ray data collection and structure determination</b> .....                                                                                                                                                                                                                                                                                                                                                                                                                | S6  |
| <b>Table S1</b> Summary of crystal data and structure refinement parameters for <b>CP1</b> , <b>CP2</b> , <b>CP3</b> , <b>CP4</b> , <b>CP5</b> and <b>CP6</b> . ....                                                                                                                                                                                                                                                                                                             | S7  |
| <b>Fig. S1</b> $^1\text{H}$ NMR data of tpeb ligand (400 MHz, $\text{CDCl}_3$ ). ....                                                                                                                                                                                                                                                                                                                                                                                            | S9  |
| <b>Fig. S2</b> View of the coordination environment of the Zn1 in <b>CP1</b> with a labelling scheme. Hydrogen atoms were omitted for clarity.....                                                                                                                                                                                                                                                                                                                               | S9  |
| <b>Fig. S3</b> (A) View of the coordination environment of the Zn1 in <b>CP2</b> with a labelling scheme. (B) A section of the 1D helix chain extending along the <i>b</i> axis of <b>CP2</b> . (C) Two adjacent 1D chains in the structure of <b>CP2</b> . Hydrogen atoms were omitted for clarity. ....                                                                                                                                                                        | S10 |
| <b>Fig. S4</b> View of the coordination environment of the Zn1 in <b>CP3</b> (A) with a labelling scheme, same as Cd1 in <b>CP6</b> (B). Hydrogen atoms were omitted for clarity. ....                                                                                                                                                                                                                                                                                           | S11 |
| <b>Fig. S5</b> View of the asymmetric unit of <b>CP4</b> with a labelling scheme (A) and the different coordination environments of Cd1 (B) and Cd2 (C) in <b>CP4</b> . Hydrogen atoms were omitted for clarity. ....                                                                                                                                                                                                                                                            | S12 |
| <b>Fig. S6</b> (A) View of the coordination environment of the Cd1 in <b>CP5</b> . (B) A 2D layer composed of 1,3-chdc linkers and $\text{Cd}^{2+}$ in <b>CP5</b> . (C) The 3D pillar-layer framework of <b>CP5</b> . Hydrogen atoms were omitted for clarity.....                                                                                                                                                                                                               | S13 |
| <b>Fig. S7</b> The PXRD patterns of <b>CP1-CP6</b> . ....                                                                                                                                                                                                                                                                                                                                                                                                                        | S14 |
| <b>Fig. S8</b> The TGA curves of <b>CP1-CP6</b> in a $\text{N}_2$ atmosphere from room temperature to 800 °C. ....                                                                                                                                                                                                                                                                                                                                                               | S15 |
| <b>Fig. S9</b> View of the alignment of the tpeb ligands in <b>CP1-CP6</b> .....                                                                                                                                                                                                                                                                                                                                                                                                 | S16 |
| <b>Table S2</b> The distances of C=C bonds in <b>CP1-CP6</b> .....                                                                                                                                                                                                                                                                                                                                                                                                               | S16 |
| <b>Fig. S10</b> The $^1\text{H}$ NMR spectra of <b>CP1</b> after UV light ( $\lambda = 365$ nm) irradiation at 298 K (B) and 263 K (C) for 24 h (400 MHz, $\text{DMSO}-d_6$ ) and the alignment of tpeb ligands in <b>CP1</b> (A).....                                                                                                                                                                                                                                           | S17 |
| <b>Fig. S11</b> The $^1\text{H}$ NMR spectra of <b>CP2</b> after UV light ( $\lambda = 365$ nm) irradiation at 298 K (B) and 263 K (C) for different time (400 MHz, $\text{DMSO}-d_6$ ) and the alignment of tpeb ligands before and after the photocycloaddition reaction (A). Plots of conversion of tpeb in <b>CP2</b> versus irradiation time based on $^1\text{H}$ NMR result (D) and corresponding fitting of kinetic rate at 298 K (E) and 263 K (F) of <b>CP2</b> . .... | S18 |
| <b>Fig. S12</b> The $^1\text{H}$ NMR spectra of <b>CP3</b> after UV light ( $\lambda = 365$ nm) irradiation at 298 K (B) and 263 K (C) for different time (400 MHz, $\text{DMSO}-d_6$ ) and the alignment of tpeb ligands before and after the photocycloaddition reaction (A). Plots of conversion of tpeb in <b>CP3</b> versus irradiation time                                                                                                                                |     |

|                                                                                                                                                                                                                                                                                                                                                                                                                                                                             |     |
|-----------------------------------------------------------------------------------------------------------------------------------------------------------------------------------------------------------------------------------------------------------------------------------------------------------------------------------------------------------------------------------------------------------------------------------------------------------------------------|-----|
| based on $^1\text{H}$ NMR result (D) and corresponding fitting of kinetic rate at 298 K (E) and 263 K (F) of <b>CP3</b> .                                                                                                                                                                                                                                                                                                                                                   | S19 |
| <b>Fig. S13</b> The $^1\text{H}$ NMR spectra of <b>CP4</b> after UV light ( $\lambda = 365$ nm) irradiation at 298 K (B) and 263 K (C) for different time (400 MHz, $\text{DMSO}-d_6$ ) and the alignment of tpeb ligands before and after the photocycloaddition reaction (A). Plots of conversion of tpeb in <b>CP4</b> versus irradiation time based on $^1\text{H}$ NMR result (D) and corresponding fitting of kinetic rate at 298 K (E) and 263 K (F) of <b>CP4</b> . | S20 |
| <b>Fig. S14</b> The $^1\text{H}$ NMR spectra of <b>CP5</b> after UV light ( $\lambda = 365$ nm) irradiation at 298 K (B) and 263 K (C) for different time (400 MHz, $\text{DMSO}-d_6$ ) and the alignment of tpeb ligands before and after the photocycloaddition reaction (A). Plots of conversion of tpeb in <b>CP5</b> versus irradiation time based on $^1\text{H}$ NMR result (D) and corresponding fitting of kinetic rate at 298 K (E) and 263 K (F) of <b>CP5</b> . | S21 |
| <b>Fig. S15</b> The $^1\text{H}$ NMR spectra of <b>CP6</b> after UV light ( $\lambda = 365$ nm) irradiation at 298 K (B) and 263 K (C) for different time (400 MHz, $\text{DMSO}-d_6$ ) and the alignment of tpeb ligands before and after the photocycloaddition reaction (A). Plots of conversion of tpeb in <b>CP6</b> versus irradiation time based on $^1\text{H}$ NMR result (D) and corresponding fitting of kinetic rate at 298 K (E) and 263 K (F) of <b>CP6</b> . | S22 |
| <b>Fig. S16</b> The PXRD patterns of <b>CP1-CP6</b> after UV irradiation for different time at 298K.                                                                                                                                                                                                                                                                                                                                                                        | S23 |
| <b>Fig. S17</b> Infrared spectra of CP1-CP6 before and after the photoreaction at 298 K.                                                                                                                                                                                                                                                                                                                                                                                    | S24 |
| <b>Fig. S18</b> The structure of Congo Red (CR).                                                                                                                                                                                                                                                                                                                                                                                                                            | S24 |
| <b>Fig. S19</b> UV-vis spectra of the adsorption of <b>CP1-CP6</b> (A) and <b>CP2a-CP6a</b> (B) to CR in aqueous solution.                                                                                                                                                                                                                                                                                                                                                  | S25 |
| <b>Table S3</b> Adsorption capacity of <b>CP1-CP6</b> on CR in aqueous solution.                                                                                                                                                                                                                                                                                                                                                                                            | S25 |
| <b>Table S4</b> Adsorption capacity of <b>CP2a-CP6a</b> on CR in aqueous solution.                                                                                                                                                                                                                                                                                                                                                                                          | S25 |
| <b>Fig. S20</b> The PXRD patterns of <b>CP6</b> and <b>CP6+CR</b> , <b>CP6a</b> and <b>CP6a+CR</b> before and after photocurrent test.                                                                                                                                                                                                                                                                                                                                      | S25 |
| <b>Fig. S21</b> Photocurrent responses of CR, <b>CP6a</b> and <b>CP6a+CR</b> coated on glassy carbon electrodes.                                                                                                                                                                                                                                                                                                                                                            | S26 |
| <b>Fig. S22</b> Photocurrent responses of CR, <b>CP5</b> and <b>CP5+CR</b> coated on glassy carbon electrodes.                                                                                                                                                                                                                                                                                                                                                              | S26 |
| <b>References</b>                                                                                                                                                                                                                                                                                                                                                                                                                                                           | S26 |

## Experimental

### 1. General methods and procedures

Ligand 1,3,5-tri-4-pyridyl-1,2-ethenylbenzene (tpeb) were prepared according to the literature methods.<sup>S1</sup> Other chemical reagents were directly available from commercial sources and used without further purification. Powder X-ray diffraction (PXRD) patterns were acquired on a PANalytical X'Pert PRO MPD system (PW3040/60) using Cu K $\alpha$  radiation ( $\lambda = 1.5406 \text{ \AA}$ ) from  $3^\circ$  to  $50^\circ$  with a scanning step size of  $0.02^\circ$ . NMR spectra were recorded on BRUKER AVANCE III HD (400 MHz) at room temperature and referenced to the residual protonated solvent for NMR spectra. Proton chemical shift  $\delta \text{ H} = 7.26$  ( $\text{CDCl}_3$ ) and  $\delta \text{ H} = 2.50$  ( $d_6$ -DMSO) ppm are reported relative to the solvent residual peak. Elemental analyses (C, H and N) were performed on a Carlo-Erba CHNO-S microanalyzer. Fourier-transform infrared (IR) spectra of the solid samples in the range  $400\text{--}4000 \text{ cm}^{-1}$  were recorded on a Specode 75. Thermogravimetric analyses (TGA) were performed on a PerkinElmer TGA 4000 under a nitrogen atmosphere at a heating rate of  $10 \text{ }^\circ\text{C min}^{-1}$ . UV-vis spectra were recorded on a Varian Cary-50 UV-Vis spectrophotometer.

### 2. Synthesis

#### 2.1 Synthesis of 1,3,5-tri-4-pyridyl-1,2-ethenylbenzene (tpeb)

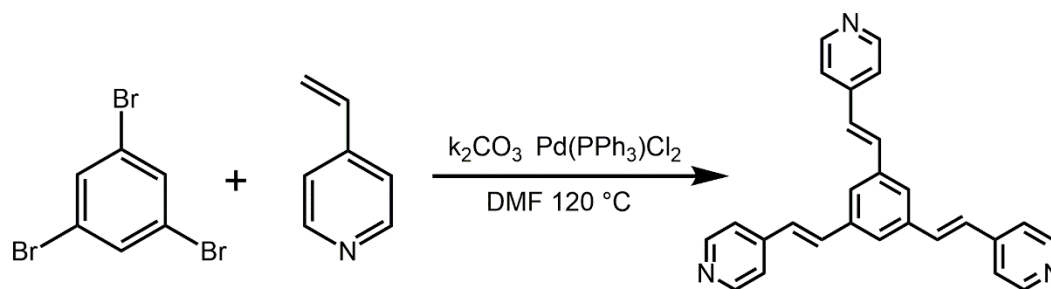

Adapted from a literature procedure,<sup>S1</sup> ligand tpeb was synthesized as follows. *N,N*-Dimethylformamide (25 mL) was added to a mixture of 1,3,5-tribromobenzene (5.666 g, 18 mmol), 4-vinylpyridine (6.750 g, 60 mmol),  $\text{K}_2\text{CO}_3$  (7.463 g, 54 mmol), bis(triphenylphosphine)palladium(II)dichloride (0.384 g, 0.54 mmol) in a 100 mL round-bottom flask at room temperature. The reaction mixture was heated to  $120 \text{ }^\circ\text{C}$  (external temperature of oil bath) under  $\text{N}_2$  atmosphere and stirred for 48 h. After cooling to ambient temperature, *N,N*-Dimethylformamide was removed under reduced pressure by evaporation and the solid after evaporation was extracted with  $\text{CH}_2\text{Cl}_2$ . The organic layer was separated and the aqueous layer was washed with  $\text{CH}_2\text{Cl}_2$ . The combined organic layers were dried over  $\text{Mg}_2\text{SO}_4$  and concentrated in vacuo. The resulting brown-yellow powder was recrystallized with anhydrous diethyl ether and filtered to give the yellow powder as the pure tpeb ligand with a yield of 82%.  $^1\text{H}$  NMR (400 MHz,  $\text{CDCl}_3$ , ppm):  $\delta$  8.62 (dd,  $J = 4.6, 1.6 \text{ Hz}$ , 6H), 7.66 (s, 3H), 7.40 (dd,  $J = 4.6, 1.6 \text{ Hz}$ , 6H), 7.34 (d,  $J = 16.0 \text{ Hz}$ , 3H), 7.12 (d,  $J = 16.0 \text{ Hz}$ , 3H) (Fig. S1).

#### 2.2 Synthesis of $\{[\text{Zn}(1,2\text{-chdc})(\text{tpeb})]\cdot\text{H}_2\text{O}\}_n$ (CP1)

To a Pyrex glass tube was loaded  $\text{Zn}(\text{NO}_3)_2\cdot 6\text{H}_2\text{O}$  (6.0 mg, 0.02 mmol), tpeb (7.7 mg, 0.02 mmol), 1,2-chdc (3.4 mg, 0.02 mmol), MeCN (0.5 mL) and  $\text{H}_2\text{O}$  (1 mL). The tube was sealed and heated in an oven at  $150 \text{ }^\circ\text{C}$  for 24 h, and then cooled to ambient

temperature to form orange rhomboid crystals of **CP1**, which were washed with ethanol and H<sub>2</sub>O and dried in air (63% yield based on Zn). Anal. calcd. (%) for C<sub>35</sub>H<sub>33</sub>N<sub>3</sub>O<sub>5</sub>Zn: C, 65.52, H, 5.14, N, 6.55; found: C, 65.68, H, 5.07, N, 6.71. FT-IR (cm<sup>-1</sup>): 3034 (m), 1737 (m), 1597 (s), 1502 (w), 1429 (m), 1379 (m), 1278 (w), 1224 (m), 1024 (m), 966 (m), 846 (m), 731 (w), 680 (m).

### 2.3 Synthesis of {[Zn(1,3-chdc)(tpeb)]·H<sub>2</sub>O}<sub>n</sub> (**CP2**)

After a Pyrex glass tube was charged with a mixture of Zn(NO<sub>3</sub>)<sub>2</sub>·6H<sub>2</sub>O (6.0 mg, 0.02 mmol), tpeb (3.9 mg, 0.01 mmol) and 1,3-chdc (3.4 mg, 0.02 mmol) in H<sub>2</sub>O (1 mL) and DMF (0.5 mL), 0.1 mL of 0.1 M HNO<sub>3</sub> solution was injected. The tube was then sealed and heated in an oven to 120 °C at the rate of 1 °C min<sup>-1</sup> and then reacted for 24 h. After it was cooled to ambient temperature at the rate of 10 °C h<sup>-1</sup>, yellow rod-shaped crystals of **CP2** were formed and collected by filtration, washed with H<sub>2</sub>O, and dried in air (78% based on tpeb). Anal. calcd. (%) for C<sub>35</sub>H<sub>33</sub>N<sub>3</sub>O<sub>5</sub>Zn: C, 65.52, H, 5.14, N, 6.55; found: C, 65.39, H, 5.19, N, 6.58. FT-IR (cm<sup>-1</sup>): 3030 (m), 1737 (m), 1635 (w), 1595 (s), 1502 (w), 1410 (m), 1217 (m), 1018 (w), 962 (m), 842 (m), 798 (m), 732 (w), 677 (m).

### 2.4 Synthesis of [Zn(1,4-chdc)(tpeb)]<sub>n</sub> (**CP3**)

Zn(NO<sub>3</sub>)<sub>2</sub>·6H<sub>2</sub>O (59.5 mg, 0.2 mmol), 1,4-chdc (34.4 mg, 0.2 mmol) and tpeb (38.7 mg, 0.1 mmol) were mixed into a 35 ml Teflon-sealed autoclave, then DMA (5 mL), H<sub>2</sub>O (10 mL) and 0.25 mL of 0.1 M HNO<sub>3</sub> solution were added. The autoclave was sealed and heated in an oven to 120 °C at the rate of 1 °C min<sup>-1</sup> and then reacted for 24 h. After it was cooled to ambient temperature at the rate of 10 °C h<sup>-1</sup>, the yellow flake crystals of **CP3** were isolated and washed with DMA and dried in air (84% based on tpeb). Anal. calcd. (%) for C<sub>35</sub>H<sub>31</sub>N<sub>3</sub>O<sub>4</sub>Zn: C, 67.40, H, 4.98, N, 6.74; found: C, 67.36, H, 5.09, N, 6.93. FT-IR (cm<sup>-1</sup>): 3026 (m), 1741 (m), 1631 (w), 1593 (s), 1502 (w), 1442 (w), 1429 (m), 1340 (m), 1300 (m), 1203 (m), 1068 (w), 1016 (m), 950 (s), 842 (s), 800 (m), 677 (m).

### 2.5 Synthesis of {[Cd<sub>2</sub>(1,2-chdc)(1,2-Hchdc)(H<sub>2</sub>O)(tpeb)<sub>2</sub>]·(NO<sub>3</sub>)(H<sub>2</sub>O)}<sub>n</sub> (**CP4**)

Yellow rod-shaped of **CP4** were obtained in a similar manner to that used for the isolation of **CP2**, using Cd(NO<sub>3</sub>)<sub>2</sub>·4H<sub>2</sub>O (6.2 mg, 0.02 mmol), 1,2-chdc (3.4 mg, 0.02 mmol), tpeb (7.7 mg, 0.02 mmol) as starting materials in H<sub>2</sub>O/DMF without HNO<sub>3</sub> solution (72% based on Cd). Anal. calcd. (%) for C<sub>70</sub>H<sub>67</sub>N<sub>7</sub>O<sub>13</sub>Cd<sub>2</sub>: C, 58.37, H, 4.66, N, 6.81; found: C, 58.51, H, 4.59, N, 6.49. FT-IR (cm<sup>-1</sup>): 3300 (b), 3030 (m), 1739 (m), 1635 (w), 1606 (s), 1575 (s), 1502 (m), 1413 (m), 1300 (m), 1226 (m), 1068 (w), 1012 (m), 968 (s), 846 (s), 802 (s), 763 (m), 711 (m), 678 (s).

### 2.6 Synthesis of [Cd(1,3-chdc)(tpeb)]<sub>n</sub> (**CP5**)

Yellow flake of **CP5** were obtained in a similar manner to that used for the isolation of **CP3**, using Cd(NO<sub>3</sub>)<sub>2</sub>·4H<sub>2</sub>O (24.7 mg, 0.08 mmol), 1,3-chdc (13.8 mg, 0.08 mmol), tpeb (15.5 mg, 0.04 mmol) as starting materials in H<sub>2</sub>O (5 mL) and DMF (3.5 mL) with 0.2 mL HNO<sub>3</sub> solution (88% based on tpeb). Anal. calcd. (%) for C<sub>35</sub>H<sub>31</sub>N<sub>3</sub>O<sub>4</sub>Cd: C, 62.68, H, 4.62, N, 6.26; found: C, 62.25, H, 4.79, N, 6.39. FT-IR (cm<sup>-1</sup>): 3036 (m), 1732 (m), 1633 (w), 1593 (s), 1500 (m), 1402 (s), 1224 (m), 1066 (m), 1014 (s), 966 (s), 842 (s), 798 (s), 742 (m), 677 (s).

### 2.7 Synthesis of [Cd(1,4-chdc)(tpeb)]<sub>n</sub> (**CP6**)

Yellow flake of **CP6** were obtained in a similar manner to that used for the isolation of **CP2**, using  $\text{Cd}(\text{NO}_3)_2 \cdot 4\text{H}_2\text{O}$  (6.2 mg, 0.02 mmol), 1,4-chdc (3.4 mg, 0.02 mmol), tpeb (3.9 mg, 0.01 mmol) as starting materials in  $\text{H}_2\text{O}$  (1.2 mL) and DMA (0.3 mL) with 0.1 mL  $\text{HNO}_3$  solution (82% based on tpeb). Anal. calcd. (%) for  $\text{C}_{35}\text{H}_{31}\text{N}_3\text{O}_4\text{Cd}$ : C, 62.68, H, 4.62, N, 6.26; found: C, 62.36, H, 4.39, N, 6.53. FT-IR ( $\text{cm}^{-1}$ ): 3028 (m), 1741 (m), 1618 (m), 1608 (s), 1570 (s), 1502 (m), 1446 (m), 1402 (s), 1342 (m), 1303 (m), 1205 (m), 1068 (w), 1016 (m), 952 (m), 842 (s), 798 (m), 677 (s).

## 2.8 Synthesis of **CP2a-CP6a**

Irradiation of single crystals of **CP2-CP6** (100 mg) by using a high power LED lamp source (Beijing Perfectlight: PLSLED 100C) of 365 nm wavelength with 50 W power at 298 K for 6 h, 28 h, 10 h, 20 h and 24 h afforded its photoproduct **CP2a-CP6a**.

## 2.9 Photocurrent response measurements

Photocurrent response measurements were performed on a CHI 660E electrochemical analyzer (Chenhua, Shanghai) with a conventional three electrode arrangement consisting of glassy carbon electrode as working electrode, platinum as the counter electrode, and Ag/AgCl as the reference electrode. The aqueous solution of  $0.1 \text{ mol L}^{-1} \text{Na}_2\text{SO}_4$  was used as the electrolyte. For the preparation of the working electrode, 2.5 mg of the crystalline powder and 2.5 mg carbon black was dispersed in 485  $\mu\text{L}$  of isopropanol solvent followed by adding 15  $\mu\text{L}$  of Nafion (5 wt%). After sonication for 1 h to form a homogeneous ink, a 20  $\mu\text{L}$  drop was cast on a freshly polished GCE (Effective area  $0.196 \text{ cm}^2$ ) and dried under ambient conditions. High power LED lamp source of 475 nm wavelength with an output power of 90 W was used for the electrochemical test, which was fixed 10 cm from the electrode. The electrode excitation time was 0-500 s with 20 s interval, and the test voltage was 0.5 V.

## 3. X-ray data collection and structure determination

Single crystals of **CP1-CP6** suitable for X-ray diffraction were obtained directly from the above preparations. Single crystals coated with Paratone oil on a Cryoloop pin were mounted on a Bruker Smart CCD diffractometer with a graphite monochromated Mo  $\text{K}\alpha$  radiation ( $\lambda = 0.71073 \text{ \AA}$ ) (**CP2**, **CP6**) and a graphite monochromated Ga  $\text{K}\alpha$  radiation ( $\lambda = 1.34138 \text{ \AA}$ ) (**CP1**, **CP3**, **CP4**, **CP5**) at 120 K (**CP2**), 273 K (**CP3**), 137 K (**CP1**, **CP4**, **CP5**) and 296 K (**CP6**). Bruker SAINT was employed for the refinement of cell parameters and the reduction of collected data and absorption corrections (multi-scan) were applied. The crystal structures of all compounds were solved by Direct methods and refined by full-matrix least-squares techniques using the *SHELXL-2018* program.<sup>S2</sup> The non-hydrogen atoms were refined with anisotropic displacement parameters. The H atoms bonded to C and N atoms were positioned with idealized geometry and refined with fixed isotropic displacement parameters. There are highly disordered water molecules in **CP5** and it is not possible to identify the position of their hydrogen atoms based on the residual peaks on the Fourier diagram. We removed the diffraction electron data for these highly disordered water molecules using the SQUEEZE command of the PLATON package<sup>S3</sup> and used the resulting data for further refinement to produce the final cif file. A summary of the pertinent crystallographic data for these compounds is provided in Table S1. The X-ray crystallographic coordinates for structures reported in this study have been deposited at the Cambridge

Crystallographic Data Centre (CCDC), under deposition numbers 2251590 (**CP1**), 2251591 (**CP2**), 2251592 (**CP3**), 2251593 (**CP4**), 2251594 (**CP5**) and 2251595 (**CP6**), respectively. These data can be obtained free of charge from the Cambridge Crystallographic Data Centre via [www.ccdc.cam.ac.uk/data\\_request/cif](http://www.ccdc.cam.ac.uk/data_request/cif).

**Table S1** Summary of crystal data and structure refinement parameters for **CP1**, **CP2**, **CP3**, **CP4**, **CP5** and **CP6**.

| Compounds                                  | <b>CP1</b>                                                       | <b>CP2</b>                                                       | <b>CP3</b>                                                       |
|--------------------------------------------|------------------------------------------------------------------|------------------------------------------------------------------|------------------------------------------------------------------|
| Empirical formula                          | C <sub>35</sub> H <sub>33</sub> N <sub>3</sub> O <sub>5</sub> Zn | C <sub>35</sub> H <sub>33</sub> N <sub>3</sub> O <sub>5</sub> Zn | C <sub>35</sub> H <sub>31</sub> N <sub>3</sub> O <sub>4</sub> Zn |
| Formula weight                             | 641.01                                                           | 641.01                                                           | 623.00                                                           |
| Temperature (K)                            | 137.0                                                            | 120(2)                                                           | 273(2)                                                           |
| Crystal system                             | Orthorhombic                                                     | Monoclinic                                                       | Monoclinic                                                       |
| Space group                                | <i>Pbcm</i> (57)                                                 | <i>P2<sub>1</sub>/n</i> (14)                                     | <i>C2/c</i> (15)                                                 |
| <i>a</i> (Å)                               | 12.4054(11)                                                      | 7.9429(3)                                                        | 30.222(7)                                                        |
| <i>b</i> (Å)                               | 10.6944(10)                                                      | 27.8055(9)                                                       | 13.045(2)                                                        |
| <i>c</i> (Å)                               | 24.935(2)                                                        | 12.8882(5)                                                       | 15.589(3)                                                        |
| $\beta$ (°)                                | 90                                                               | 96.7670(10)                                                      | 91.586(12)                                                       |
| Volume (Å <sup>3</sup> )                   | 3308.1(5)                                                        | 2826.61(18)                                                      | 6144(2)                                                          |
| <i>Z</i>                                   | 4                                                                | 4                                                                | 8                                                                |
| $\mu$ (mm <sup>-1</sup> )                  | 0.907                                                            | 0.920                                                            | 0.955                                                            |
| $\rho_{\text{calc}}$ (g cm <sup>-3</sup> ) | 1.287                                                            | 1.506                                                            | 1.347                                                            |
| <i>F</i> (000)                             | 1336                                                             | 1336                                                             | 2592                                                             |
| Reflections collected                      | 41500                                                            | 44579                                                            | 141630                                                           |
| Independent reflections                    | 3295                                                             | 6486                                                             | 7047                                                             |
| <i>R</i> <sub>int</sub>                    | 0.0613                                                           | 0.0650                                                           | 0.0616                                                           |
| <i>R</i> <sub>1</sub> <sup>a</sup>         | 0.1398                                                           | 0.0569                                                           | 0.0533                                                           |
| <i>wR</i> <sub>2</sub> <sup>b</sup>        | 0.2727                                                           | 0.1650                                                           | 0.1748                                                           |
| GOF <sup>c</sup>                           | 1.124                                                            | 1.049                                                            | 1.061                                                            |

to be continued for **Table S1**

| Compounds                                  | CP4                                                                            | CP5                                                              | CP6                                                              |
|--------------------------------------------|--------------------------------------------------------------------------------|------------------------------------------------------------------|------------------------------------------------------------------|
| Empirical formula                          | C <sub>70</sub> H <sub>67</sub> N <sub>7</sub> O <sub>13</sub> Cd <sub>2</sub> | C <sub>35</sub> H <sub>32</sub> N <sub>3</sub> O <sub>4</sub> Cd | C <sub>35</sub> H <sub>31</sub> N <sub>3</sub> O <sub>4</sub> Cd |
| Formula weight                             | 1439.10                                                                        | 671.03                                                           | 670.03                                                           |
| Temperature (K)                            | 137                                                                            | 136(2)                                                           | 296.15                                                           |
| Crystal system                             | Orthorhombic                                                                   | Monoclinic                                                       | Monoclinic                                                       |
| Space group                                | <i>Pbca</i> (61)                                                               | <i>C2/c</i> (15)                                                 | <i>C2/c</i> (15)                                                 |
| <i>a</i> (Å)                               | 14.6634(13)                                                                    | 29.288(4)                                                        | 29.558(6)                                                        |
| <i>b</i> (Å)                               | 24.805(2)                                                                      | 13.0795(16)                                                      | 13.226(3)                                                        |
| <i>c</i> (Å)                               | 34.107(3)                                                                      | 16.931(2)                                                        | 16.250(4)                                                        |
| $\beta$ (°)                                | 90                                                                             | 94.192(5)                                                        | 93.107(7)                                                        |
| Volume (Å <sup>3</sup> )                   | 12405.6(18)                                                                    | 6468.5(14)                                                       | 6343(2)                                                          |
| <i>Z</i>                                   | 8                                                                              | 8                                                                | 8                                                                |
| $\mu$ (mm <sup>-1</sup> )                  | 4.063                                                                          | 3.829                                                            | 0.730                                                            |
| $\rho_{\text{calc}}$ (g cm <sup>-3</sup> ) | 1.541                                                                          | 1.378                                                            | 1.403                                                            |
| <i>F</i> (000)                             | 5888                                                                           | 2744                                                             | 2736                                                             |
| Reflections collected                      | 184940                                                                         | 73708                                                            | 68662                                                            |
| Independent reflections                    | 14183                                                                          | 7395                                                             | 7298                                                             |
| <i>R</i> <sub>int</sub>                    | 0.0624                                                                         | 0.0677                                                           | 0.0721                                                           |
| <i>R</i> <sub>1</sub> <sup>a</sup>         | 0.0402                                                                         | 0.0884                                                           | 0.0806                                                           |
| <i>wR</i> <sub>2</sub> <sup>b</sup>        | 0.0997                                                                         | 0.2681                                                           | 0.2568                                                           |
| GOF <sup>c</sup>                           | 1.084                                                                          | 1.068                                                            | 1.027                                                            |

<sup>a</sup> $R_1 = \Sigma||F_o| - |F_c|| / \Sigma|F_o|$ . <sup>b</sup> $wR_2 = \{\Sigma w(F_o^2 - F_c^2)^2 / \Sigma w(F_o^2)^2\}^{1/2}$ . <sup>c</sup>GOF =  $\{\Sigma w((F_o^2 - F_c^2)^2) / (n - p)\}^{1/2}$ , where *n* = number of reflections and *p* = total numbers of parameters refined.



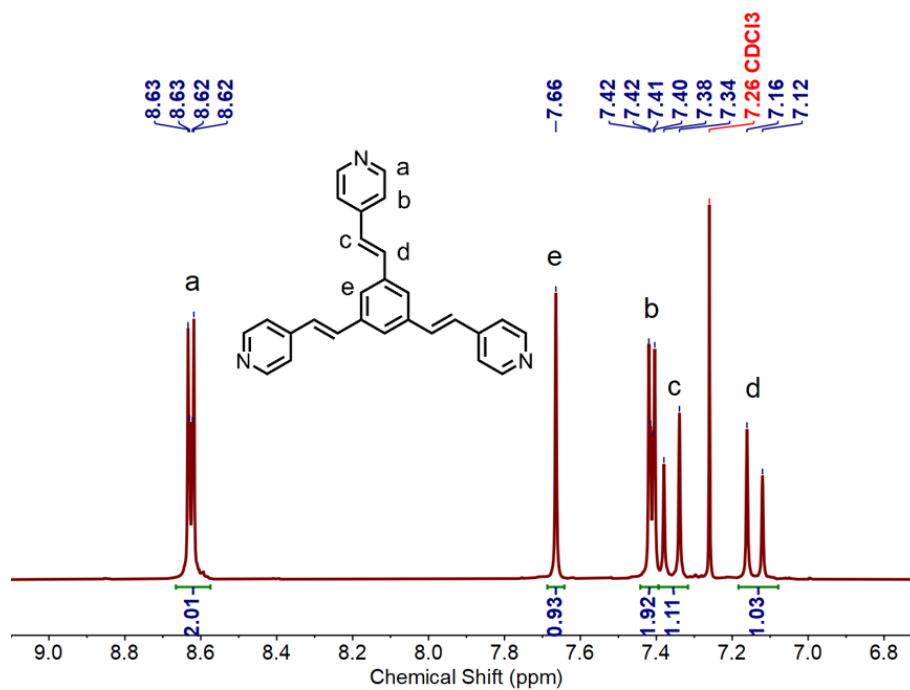

**Fig. S1**  $^1\text{H}$  NMR data of tpeb ligand (400 MHz,  $\text{CDCl}_3$ ).

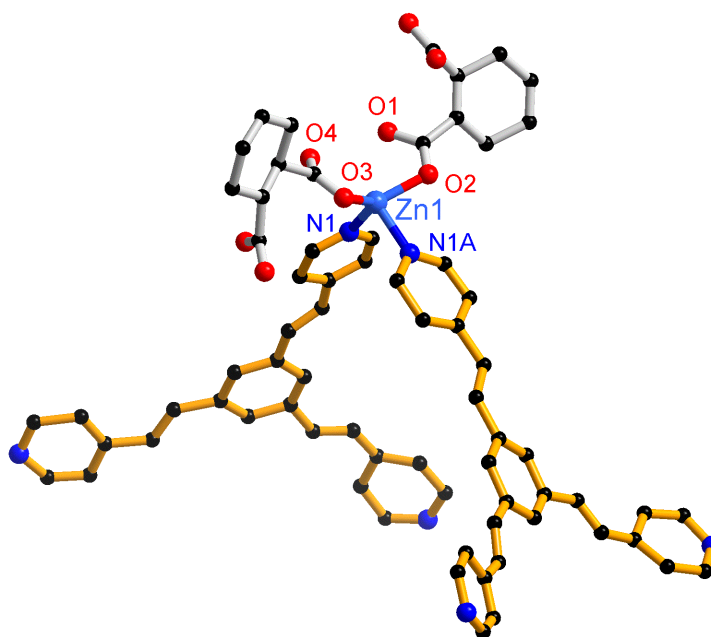

**Fig. S2** View of the coordination environment of the Zn1 in **CP1** with a labelling scheme. Hydrogen atoms were omitted for clarity.

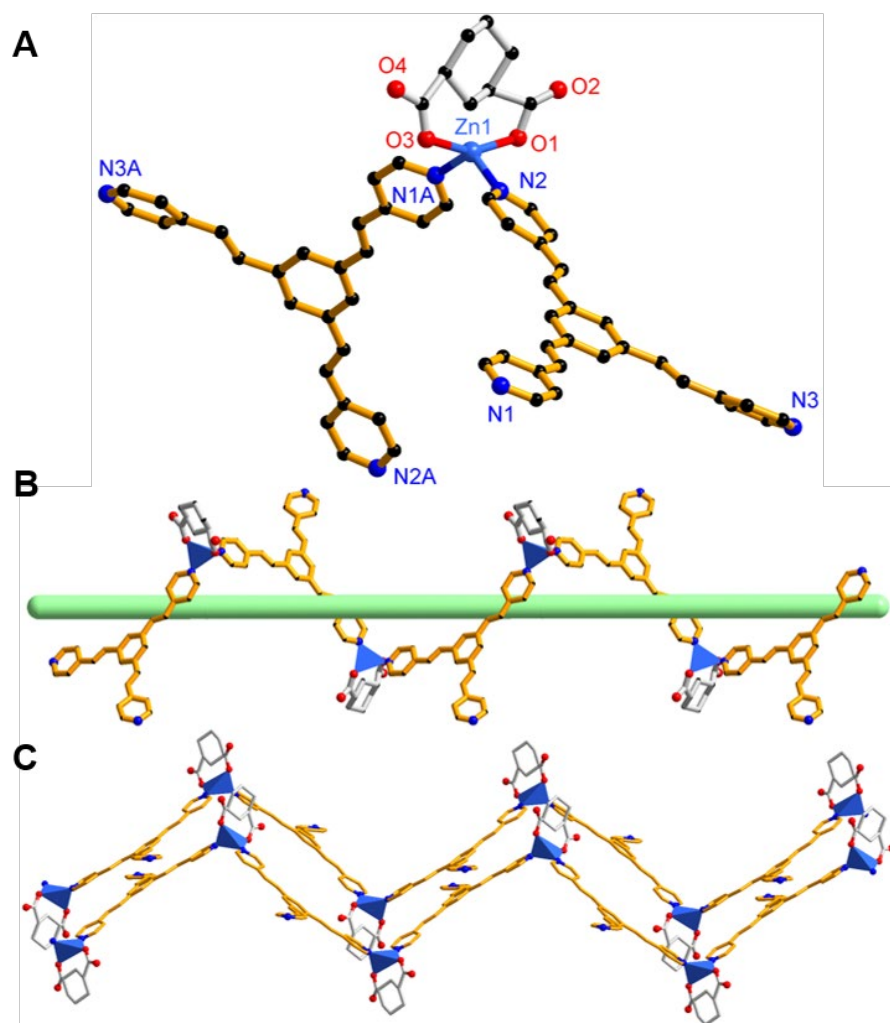

**Fig. S3** (A) View of the coordination environment of the Zn1 in **CP2** with a labelling scheme. (B) A section of the 1D helix chain extending along the *b* axis of **CP2**. (C) Two adjacent 1D chains in the structure of **CP2**. Hydrogen atoms were omitted for clarity.

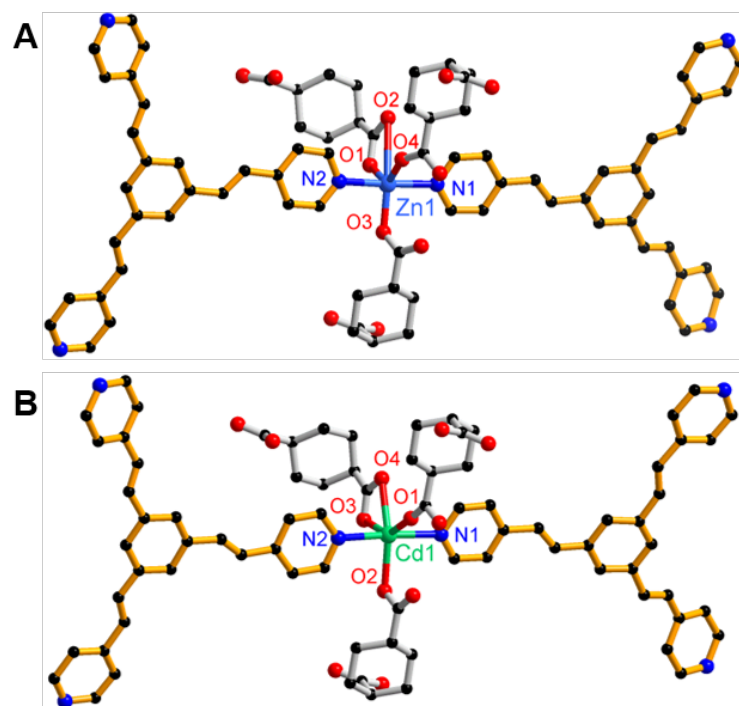

**Fig. S4** View of the coordination environment of the Zn1 in **CP3** (A) with a labelling scheme, same as Cd1 in **CP6** (B). Hydrogen atoms were omitted for clarity.

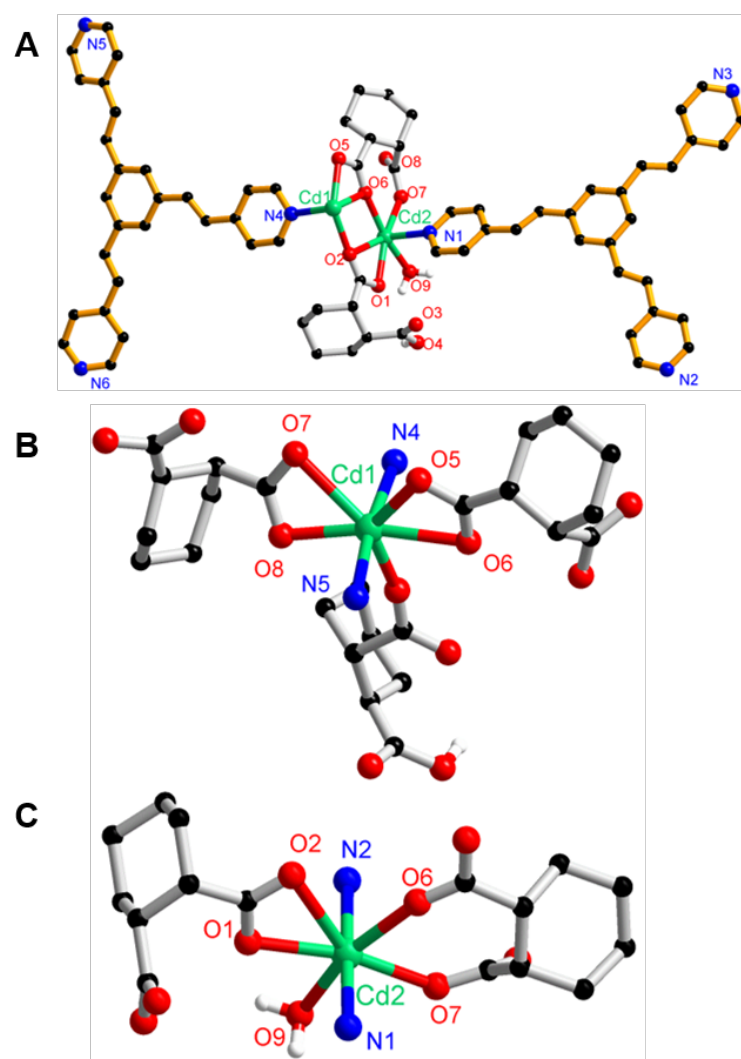

**Fig. S5** View of the asymmetric unit of **CP4** with a labelling scheme (A) and the different coordination environments of Cd1 (B) and Cd2 (C) in **CP4**. Hydrogen atoms were omitted for clarity.

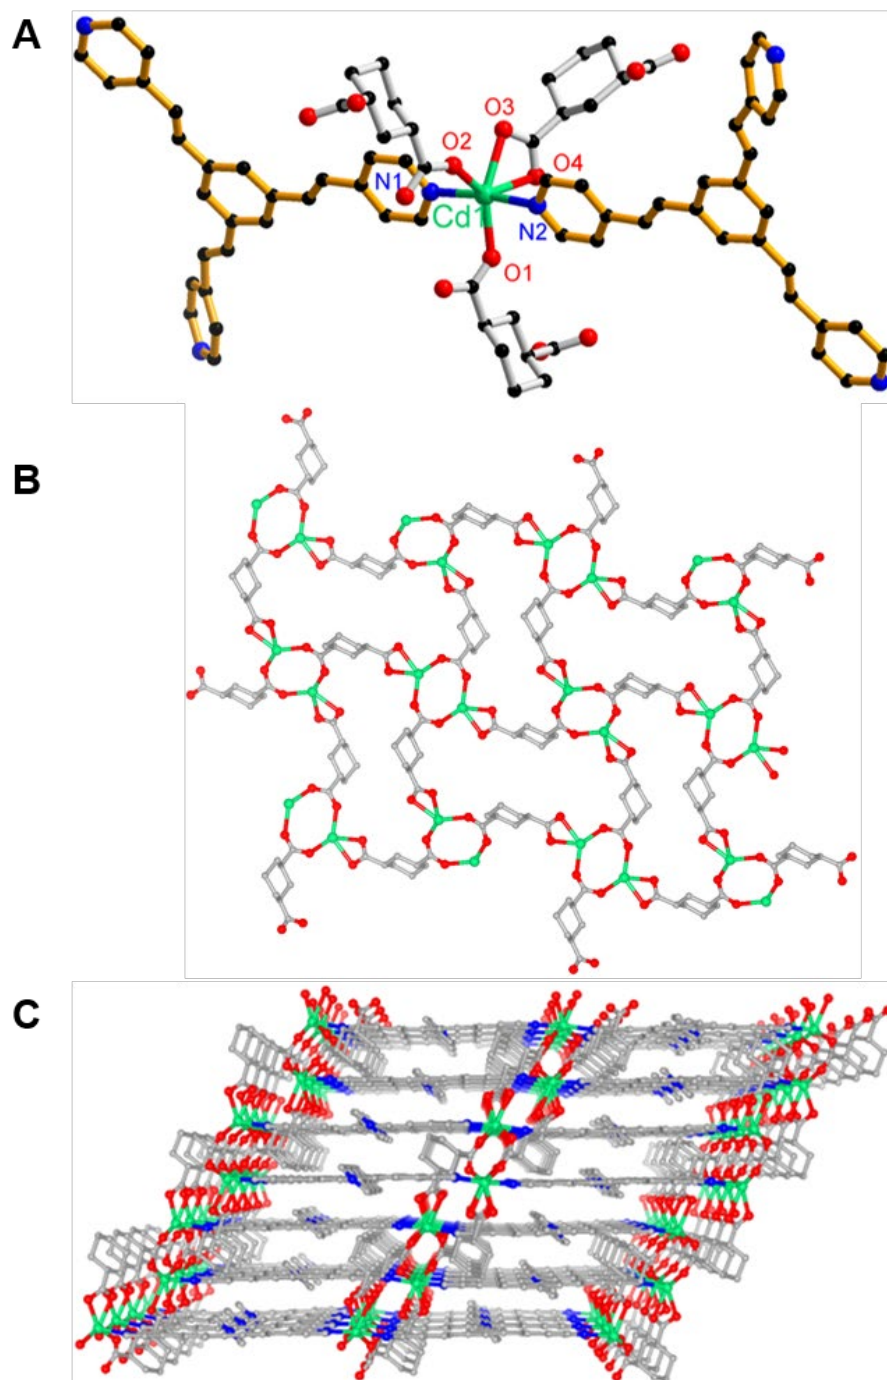

**Fig. S6** (A) View of the coordination environment of the Cd1 in **CP5**. (B) A 2D layer composed of 1,3-chdc linkers and Cd<sup>2+</sup> in **CP5**. (C) The 3D pillar-layer framework of **CP5**. Hydrogen atoms were omitted for clarity.

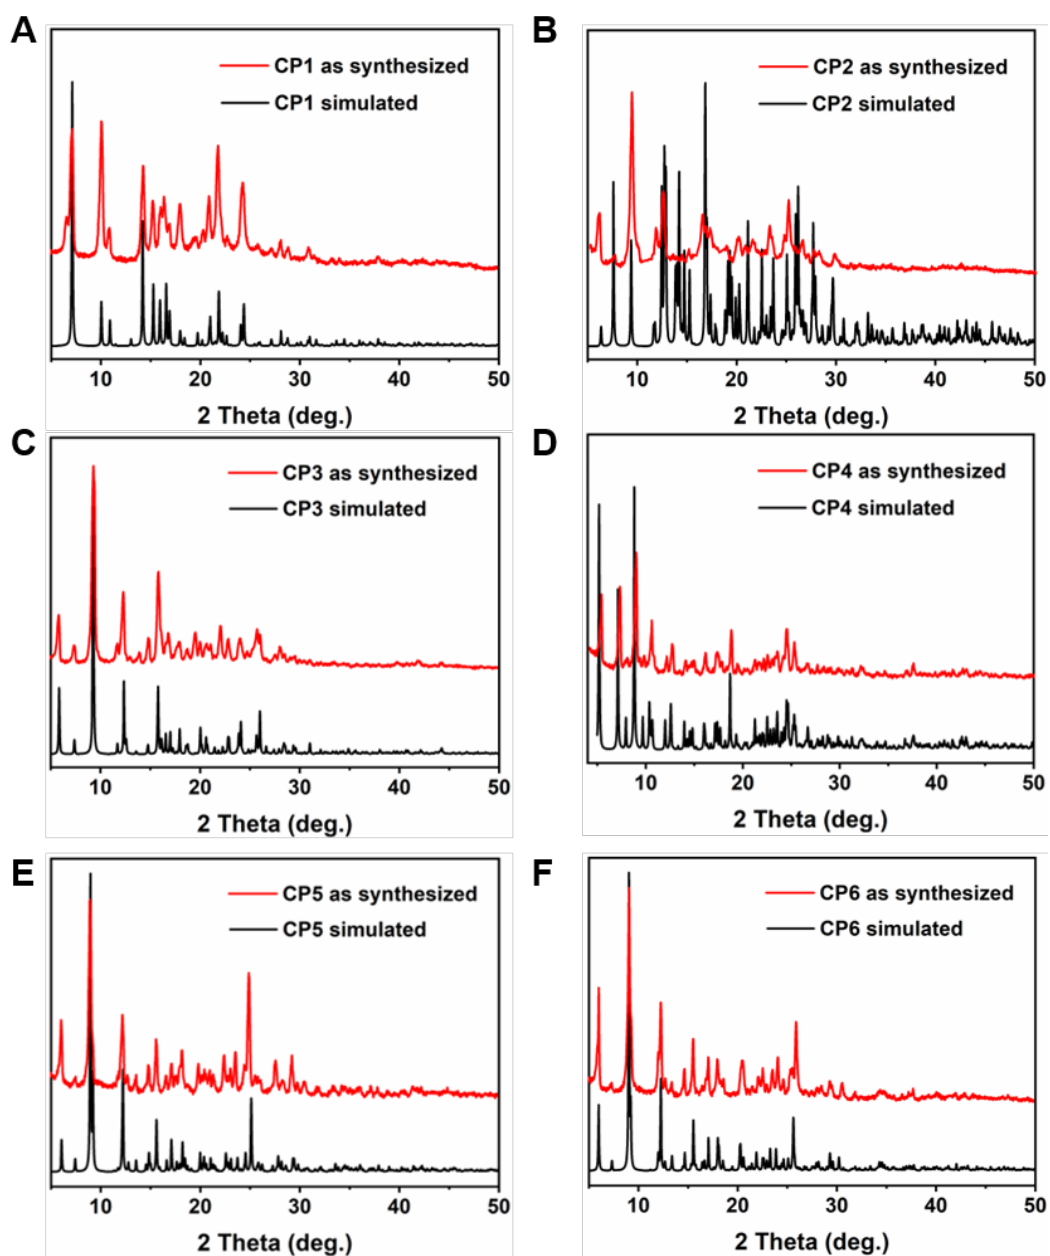

**Fig. S7** The PXRD patterns of CP1-CP6.

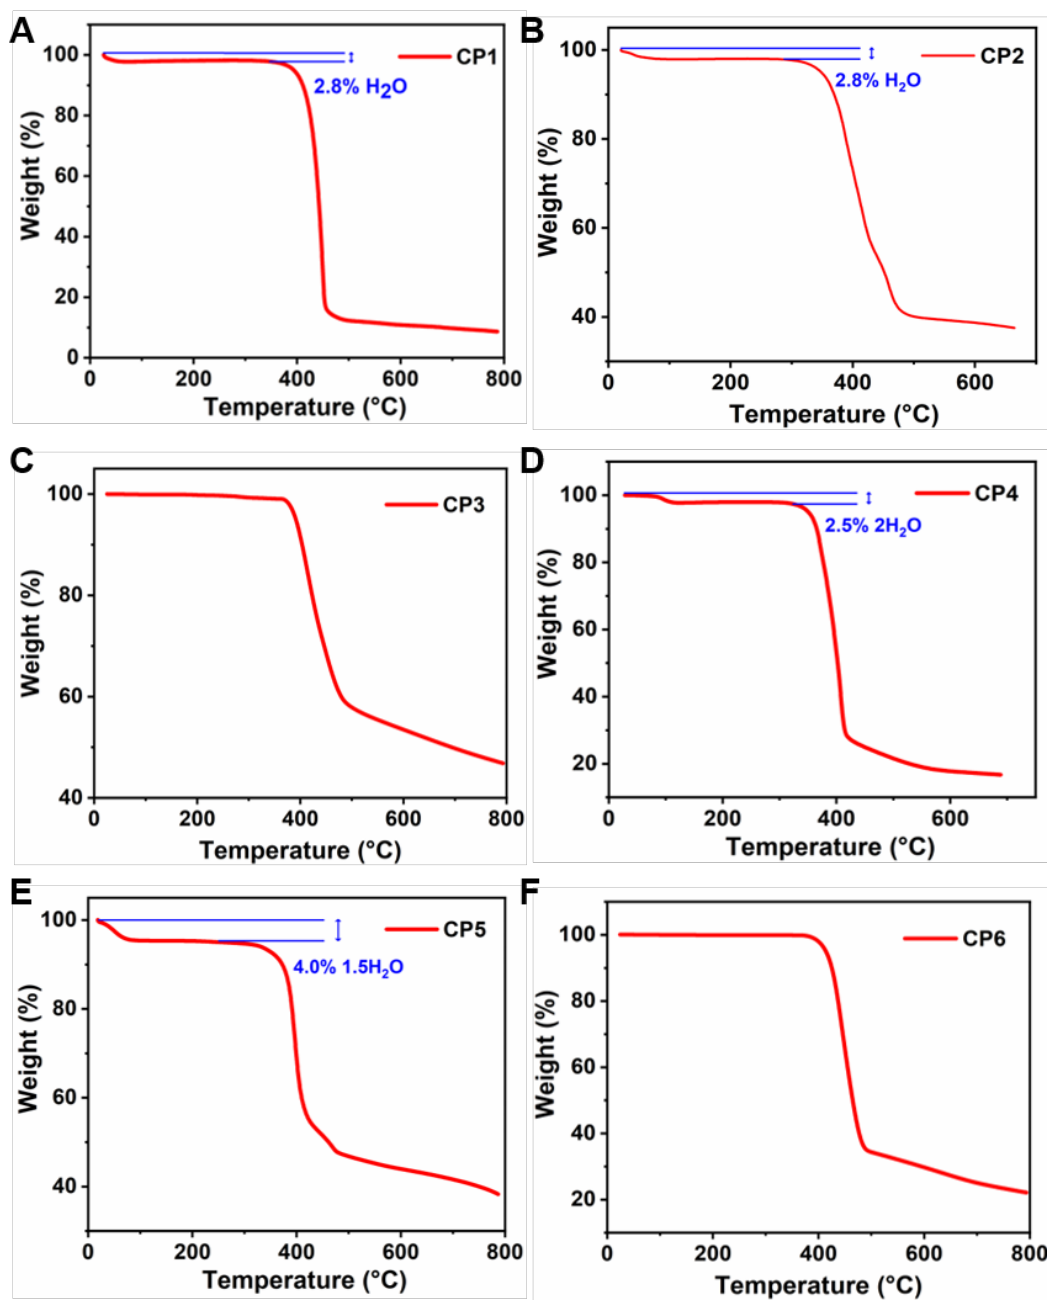

**Fig. S8** The TGA curves of CP1-CP6 in a N<sub>2</sub> atmosphere from room temperature to 800 °C.

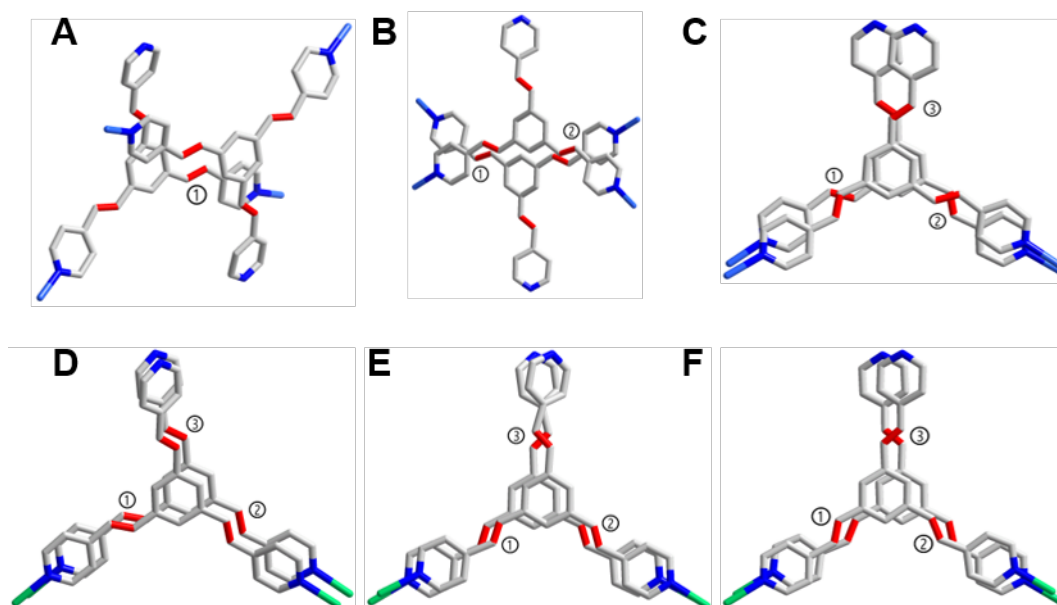

**Fig. S9** View of the alignment of the tpeb ligands in **CP1-CP6**.

**Table S2** The distances of C=C bonds in **CP1-CP6**.

| C=C        | ①                               | ②                               | ③                               |
|------------|---------------------------------|---------------------------------|---------------------------------|
| <b>CP1</b> | 4.898 Å/4.898 Å<br>(parallel)   | -                               | -                               |
| <b>CP2</b> | 3.927 Å/4.207 Å<br>(crisscross) | 3.927 Å/4.207 Å<br>(crisscross) | -                               |
| <b>CP3</b> | 3.662 Å/3.788 Å<br>(crisscross) | 3.662 Å/3.788 Å<br>(crisscross) | 3.850 Å/4.543 Å<br>(crisscross) |
| <b>CP4</b> | 3.683 Å/3.820 Å<br>(parallel)   | 3.811 Å/3.821 Å<br>(parallel)   | 3.852 Å/4.017 Å<br>(parallel)   |
| <b>CP5</b> | 3.670 Å/3.684 Å<br>(parallel)   | 3.670 Å/3.684 Å<br>(parallel)   | 4.012 Å/4.070 Å<br>(crisscross) |
| <b>CP6</b> | 3.623 Å/3.638 Å<br>(parallel)   | 3.623 Å/3.638 Å<br>(parallel)   | 3.954 Å/4.501 Å<br>(crisscross) |



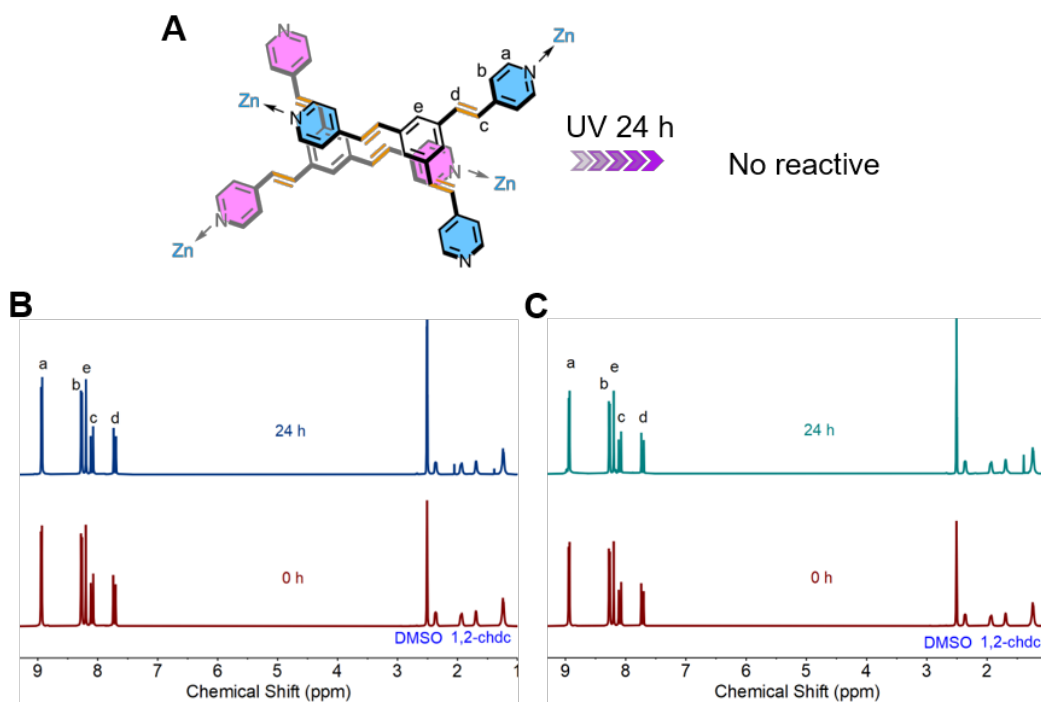

**Fig. S10** The  $^1\text{H}$  NMR spectra of **CP1** after UV light ( $\lambda = 365$  nm) irradiation at 298 K (B) and 263 K (C) for 24 h (400 MHz,  $\text{DMSO-}d_6$ ) and the alignment of tpeb ligands in **CP1** (A).

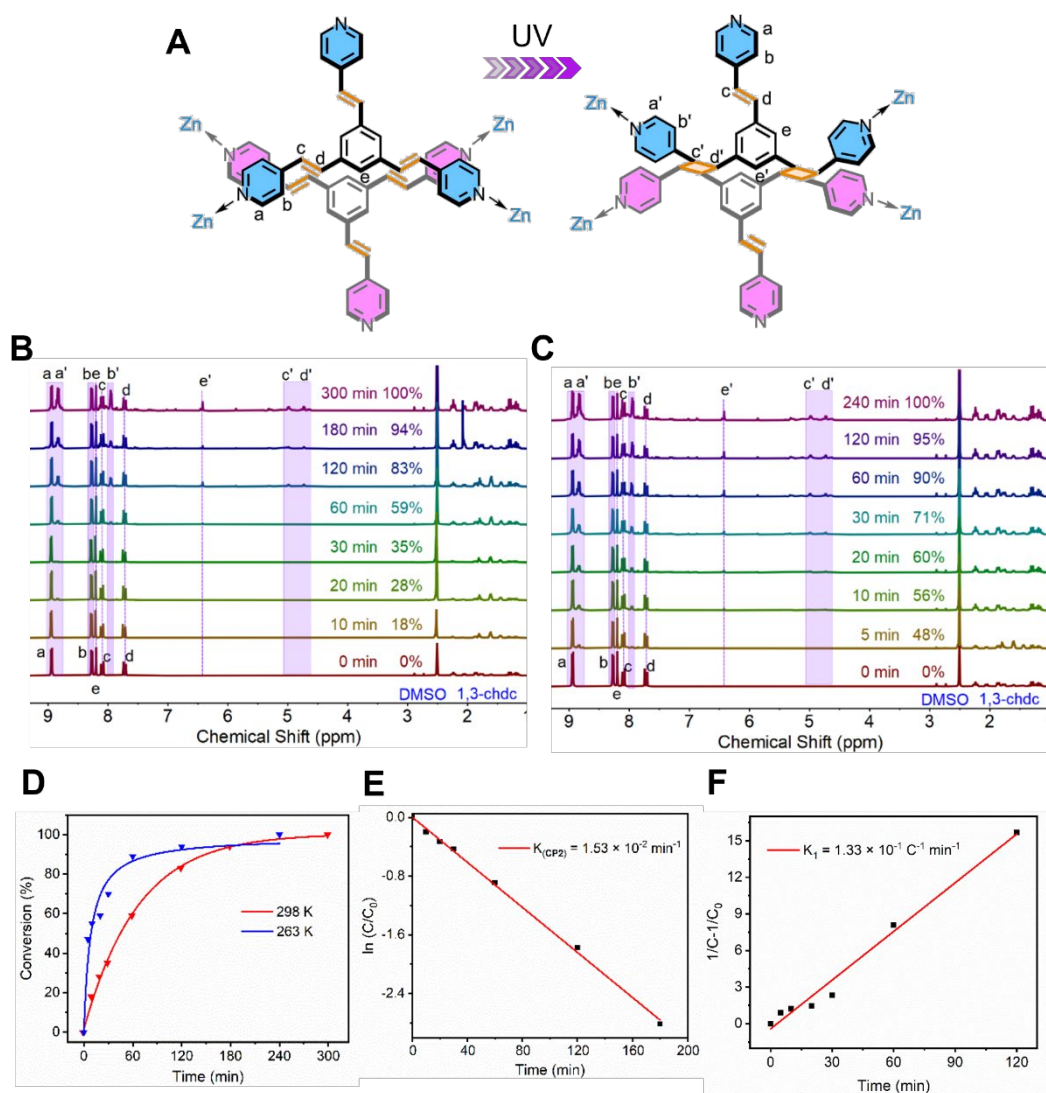

**Fig. S11** The  $^1\text{H}$  NMR spectra of **CP2** after UV light ( $\lambda = 365$  nm) irradiation at 298 K (B) and 263 K (C) for different time (400 MHz,  $\text{DMSO}-d_6$ ) and the alignment of tpeb ligands before and after the photocycloaddition reaction (A). Plots of conversion of tpeb in **CP2** versus irradiation time based on  $^1\text{H}$  NMR result (D) and corresponding fitting of kinetic rate at 298 K (E) and 263 K (F) of **CP2**.

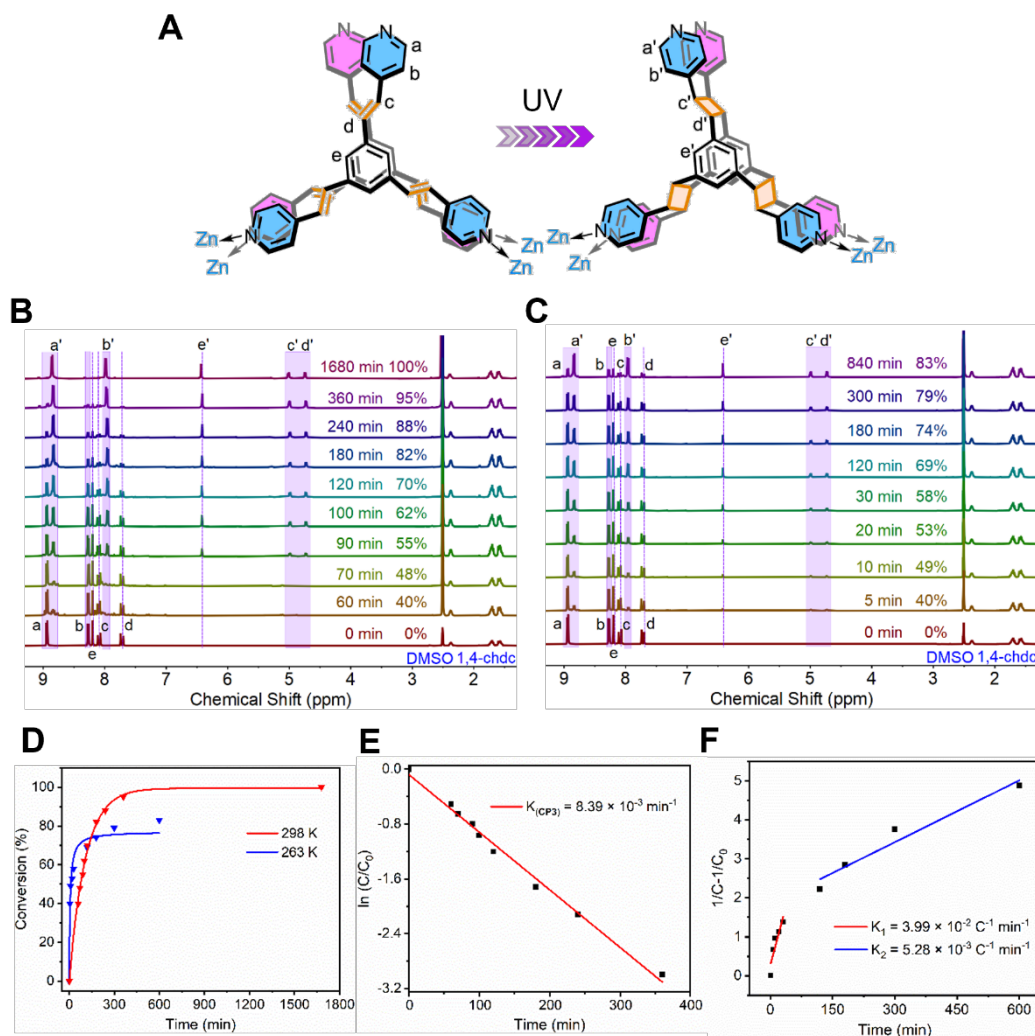

**Fig. S12** The  $^1\text{H}$  NMR spectra of **CP3** after UV light ( $\lambda = 365$  nm) irradiation at 298 K (B) and 263 K (C) for different time (400 MHz,  $\text{DMSO}-d_6$ ) and the alignment of tpeb ligands before and after the photocycloaddition reaction (A). Plots of conversion of tpeb in **CP3** versus irradiation time based on  $^1\text{H}$  NMR result (D) and corresponding fitting of kinetic rate at 298 K (E) and 263 K (F) of **CP3**.

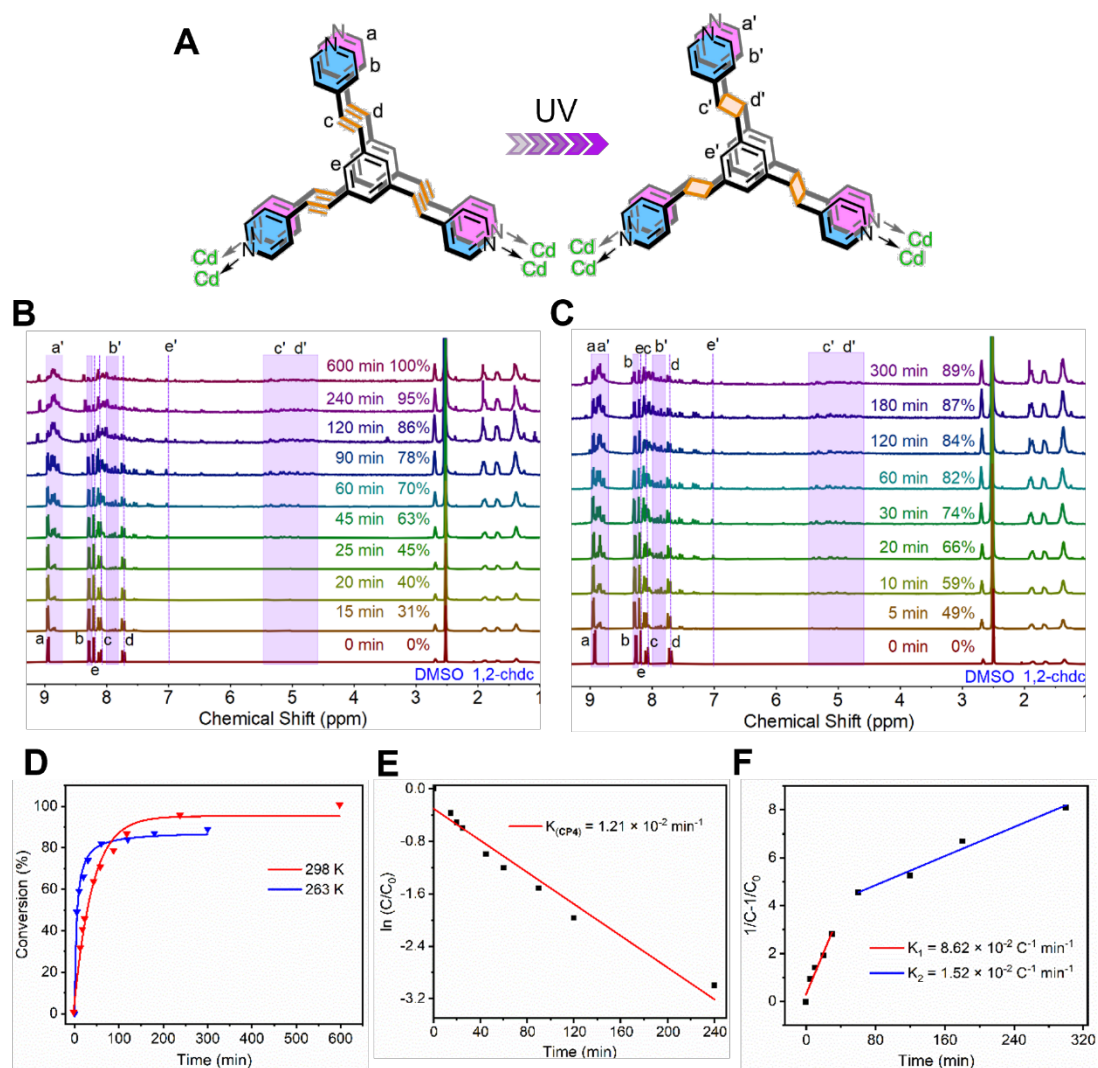

**Fig. S13** The  $^1\text{H}$  NMR spectra of **CP4** after UV light ( $\lambda = 365 \text{ nm}$ ) irradiation at 298 K (B) and 263 K (C) for different time (400 MHz,  $\text{DMSO-}d_6$ ) and the alignment of tpeb ligands before and after the photocycloaddition reaction (A). Plots of conversion of tpeb in **CP4** versus irradiation time based on  $^1\text{H}$  NMR result (D) and corresponding fitting of kinetic rate at 298 K (E) and 263 K (F) of **CP4**.

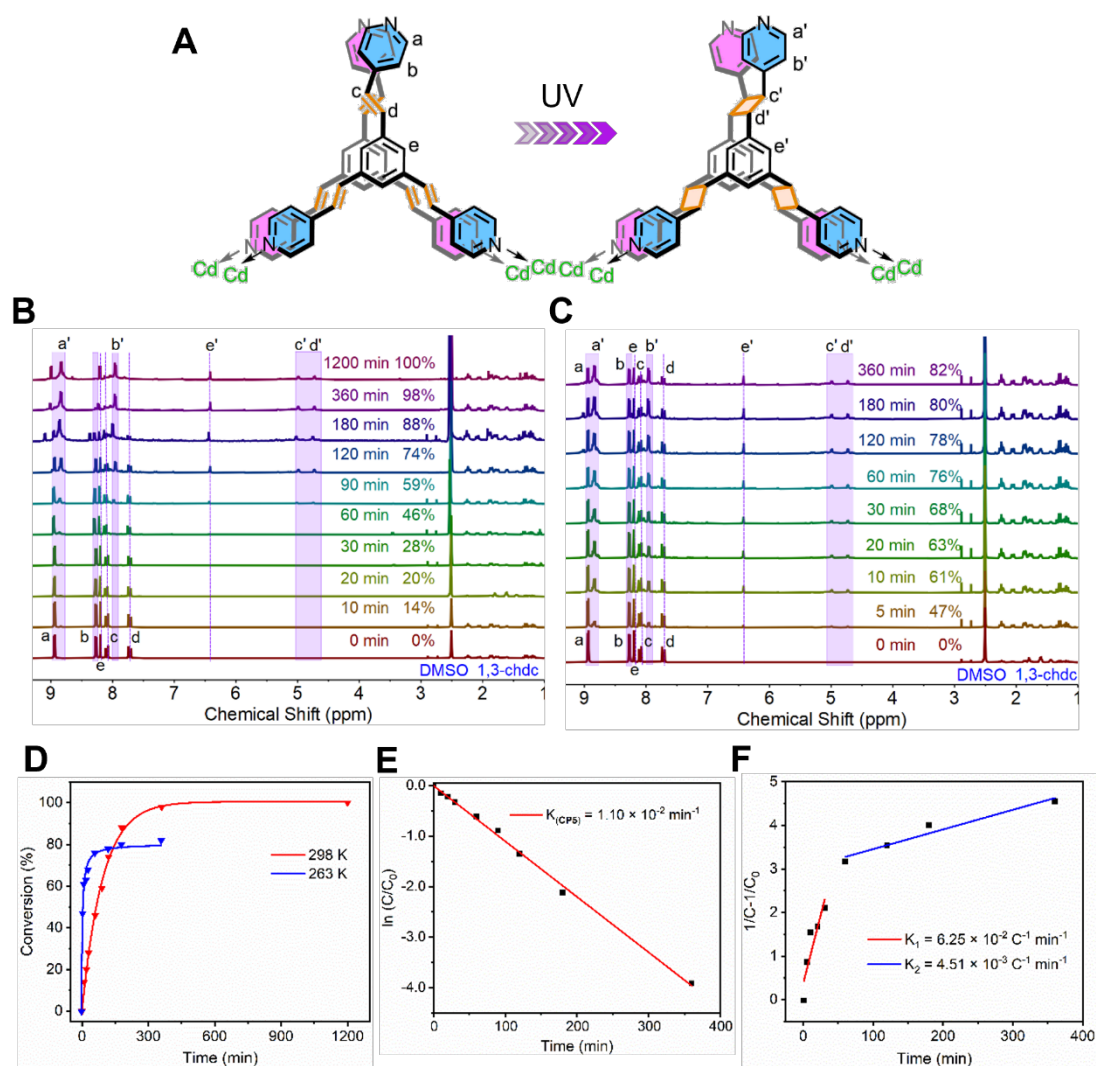

**Fig. S14** The  $^1\text{H}$  NMR spectra of **CP5** after UV light ( $\lambda = 365$  nm) irradiation at 298 K (B) and 263 K (C) for different time (400 MHz,  $\text{DMSO}-d_6$ ) and the alignment of tpeb ligands before and after the photocycloaddition reaction (A). Plots of conversion of tpeb in **CP5** versus irradiation time based on  $^1\text{H}$  NMR result (D) and corresponding fitting of kinetic rate at 298 K (E) and 263 K (F) of **CP5**.



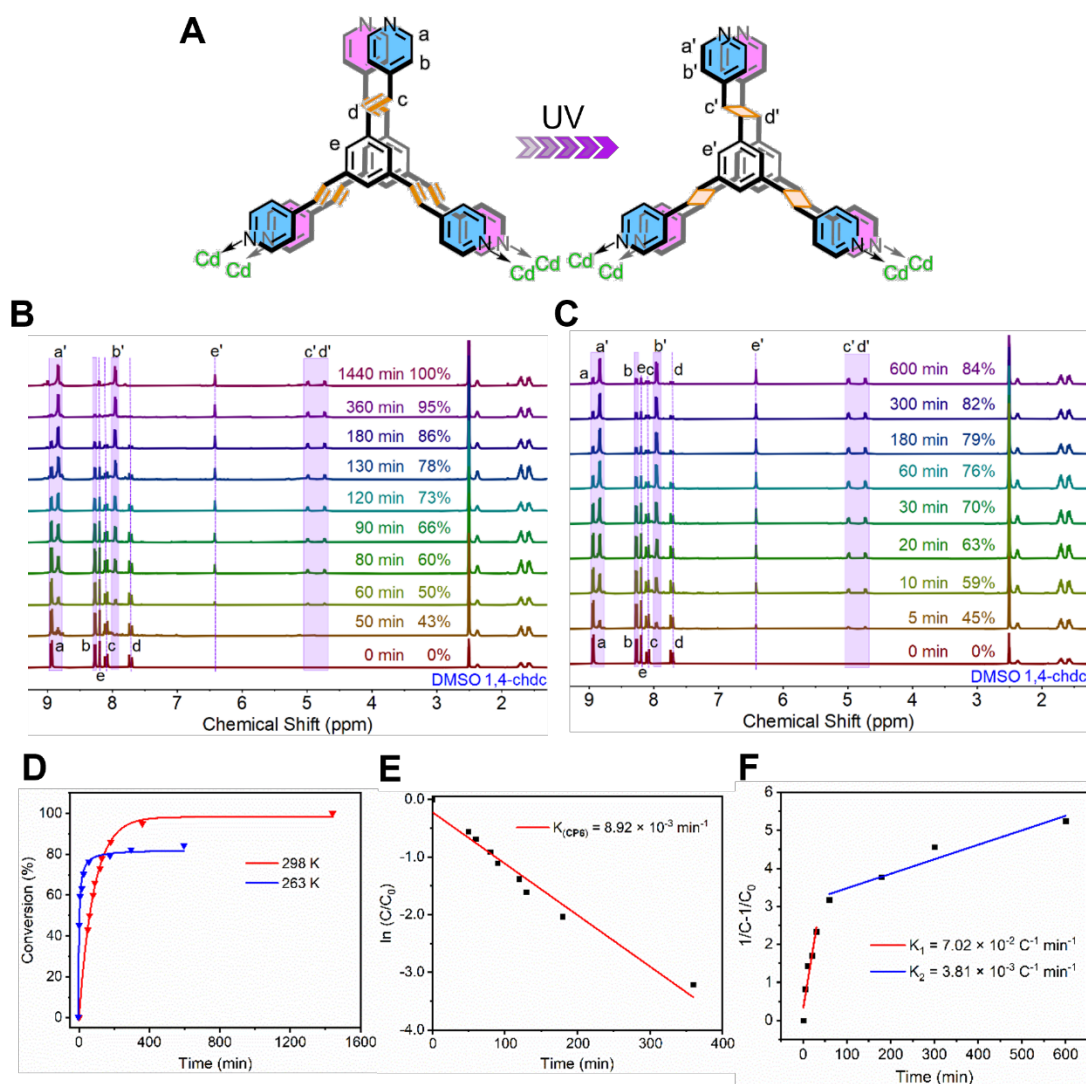

**Fig. S15** The  $^1\text{H}$  NMR spectra of **CP6** after UV light ( $\lambda = 365$  nm) irradiation at 298 K (B) and 263 K (C) for different time (400 MHz,  $\text{DMSO}-d_6$ ) and the alignment of tpeb ligands before and after the photocycloaddition reaction (A). Plots of conversion of tpeb in **CP6** versus irradiation time based on  $^1\text{H}$  NMR result (D) and corresponding fitting of kinetic rate at 298 K (E) and 263 K (F) of **CP6**.

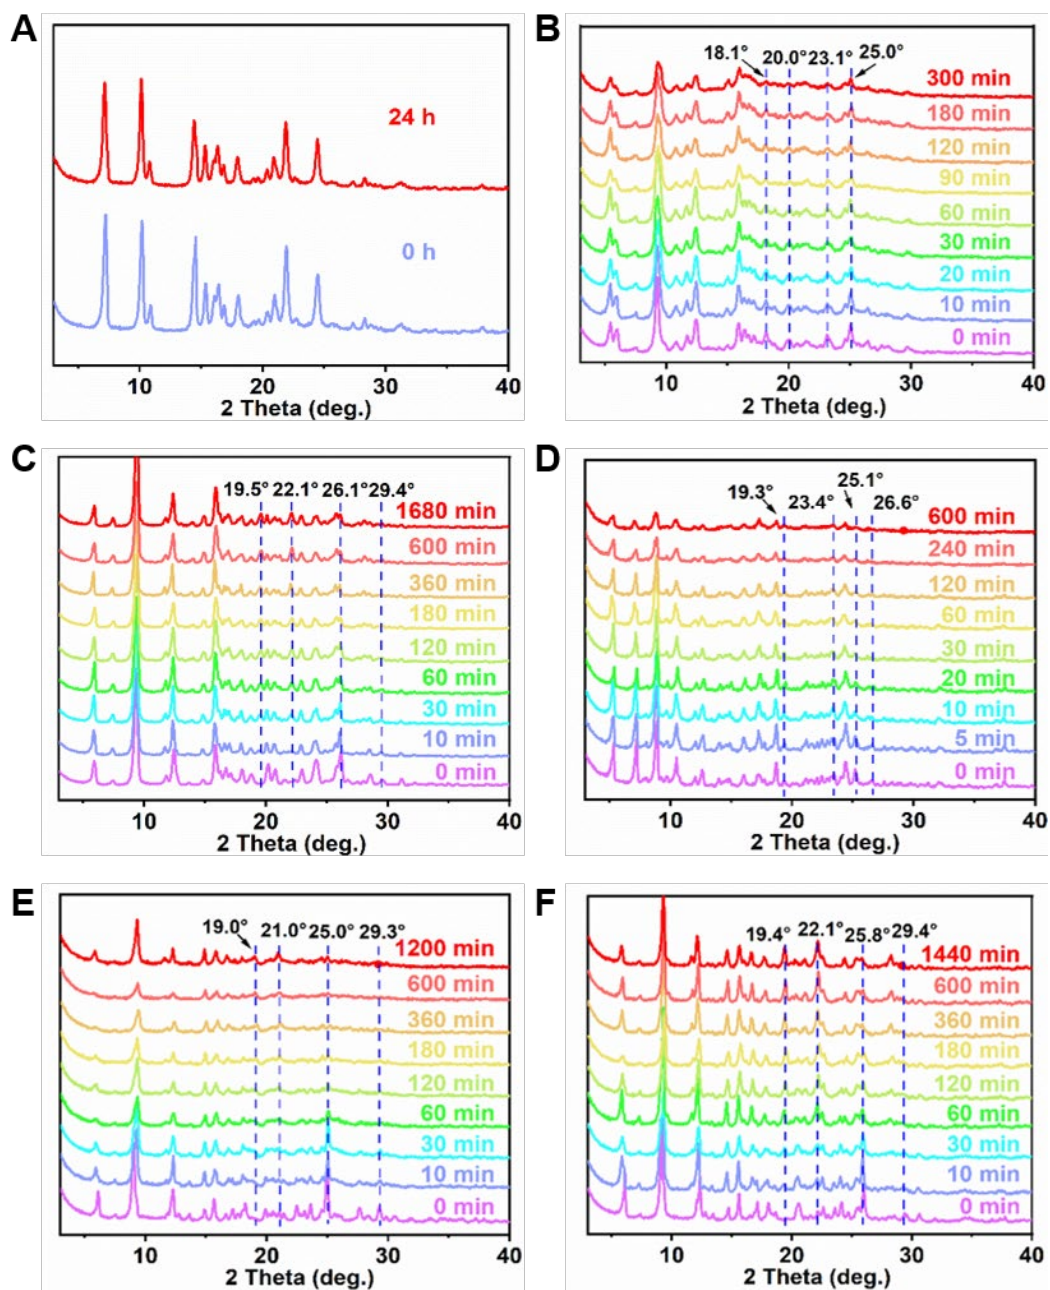

**Fig. S16** The PXRD patterns of CP1-CP6 after UV irradiation for different time at 298 K.

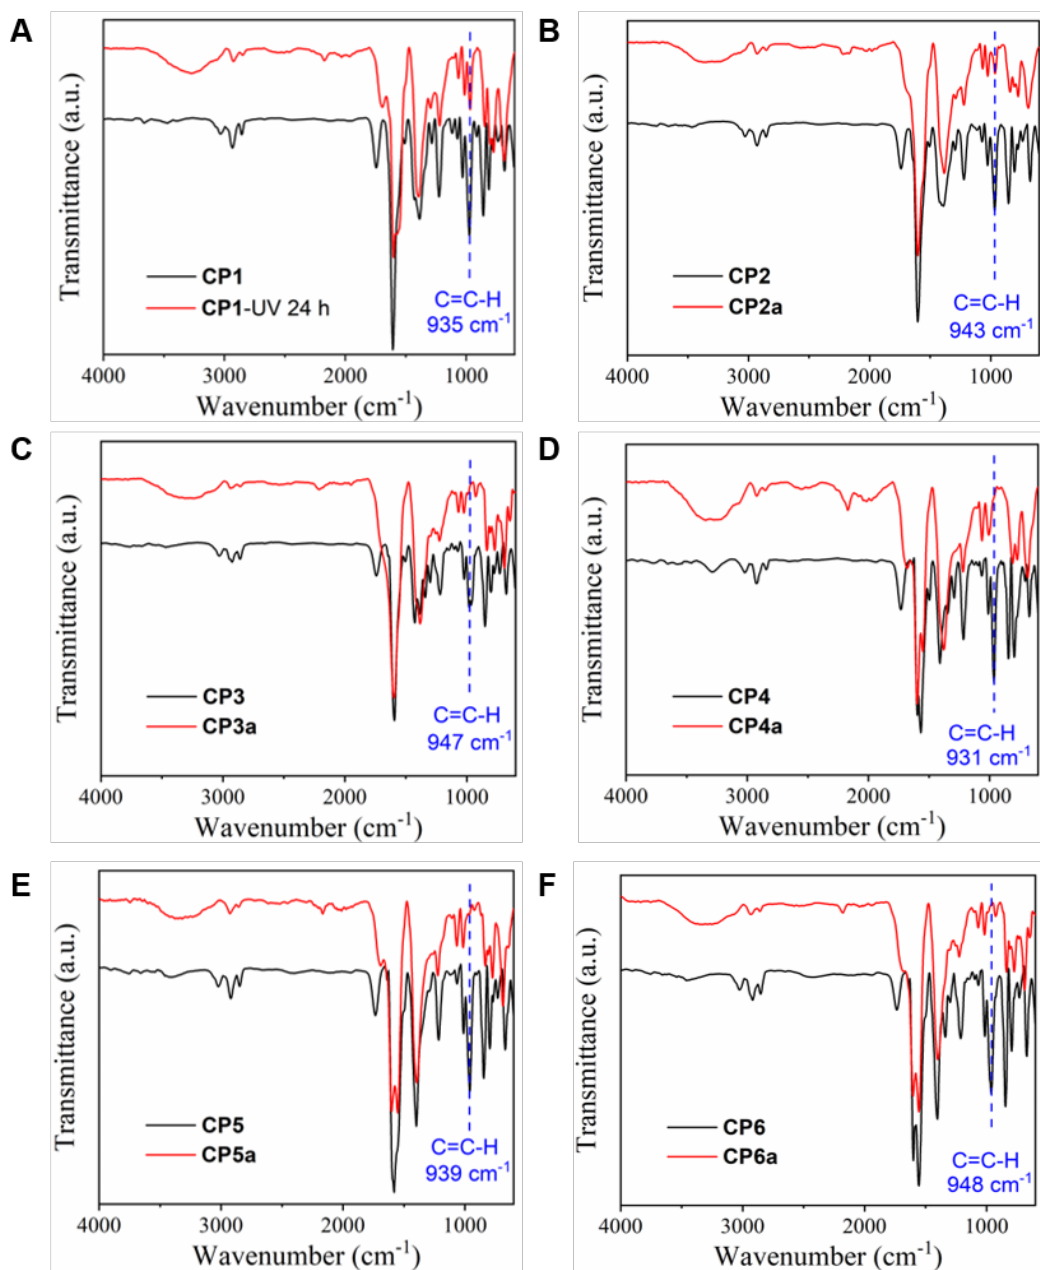

**Fig. S17** Infrared spectra of **CP1-CP6** before and after the photoreaction at 298 K.

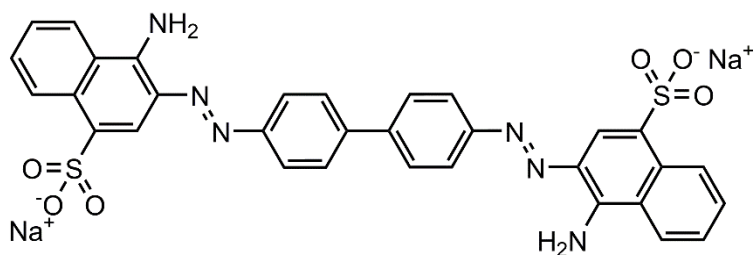

**Fig. S18** The structure of Congo Red (CR).



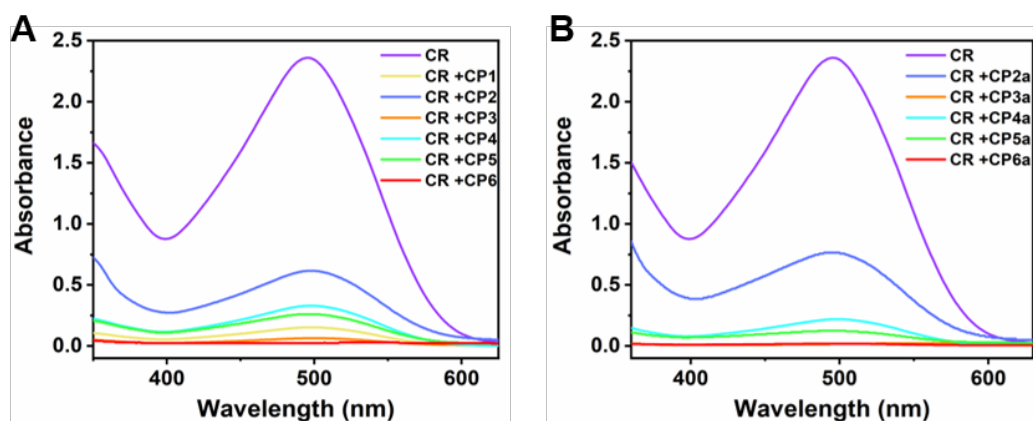

**Fig. S19** UV-vis spectra of the adsorption of **CP1-CP6** (A) and **CP2a-CP6a** (B) to CR in aqueous solution.

**Table S3** Adsorption capacity of **CP1-CP6** on CR in aqueous solution.

|                                        | CP1    | CP2    | CP3    | CP4    | CP5    | CP6    |
|----------------------------------------|--------|--------|--------|--------|--------|--------|
| CR ( $\text{mg} \cdot \text{g}^{-1}$ ) | 748.48 | 591.20 | 778.31 | 688.14 | 711.88 | 789.83 |

**Table S4** Adsorption capacity of **CP2a-CP6a** on CR in aqueous solution.

|                                        | CP2a  | CP3a   | CP4a   | CP5a   | CP6a   |
|----------------------------------------|-------|--------|--------|--------|--------|
| CR ( $\text{mg} \cdot \text{g}^{-1}$ ) | 540.9 | 792.37 | 725.77 | 757.30 | 793.90 |

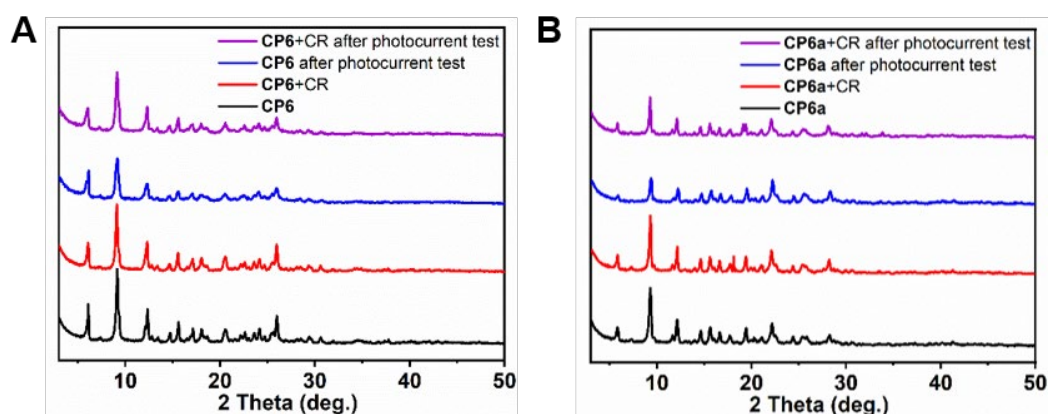

**Fig. S20** The PXRD patterns of **CP6** and **CP6+CR**, **CP6a** and **CP6a+CR** before and after photocurrent test.

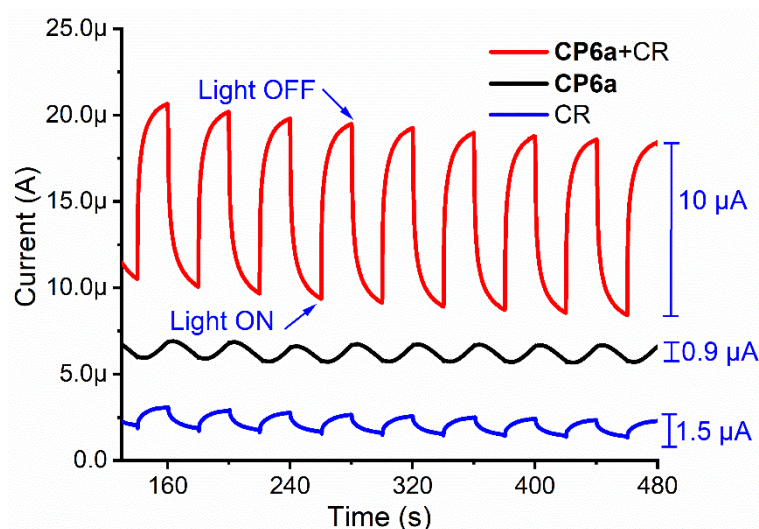

**Fig. S21** Photocurrent responses of CR, CP6a and CP6a+CR coated on glassy carbon electrodes.

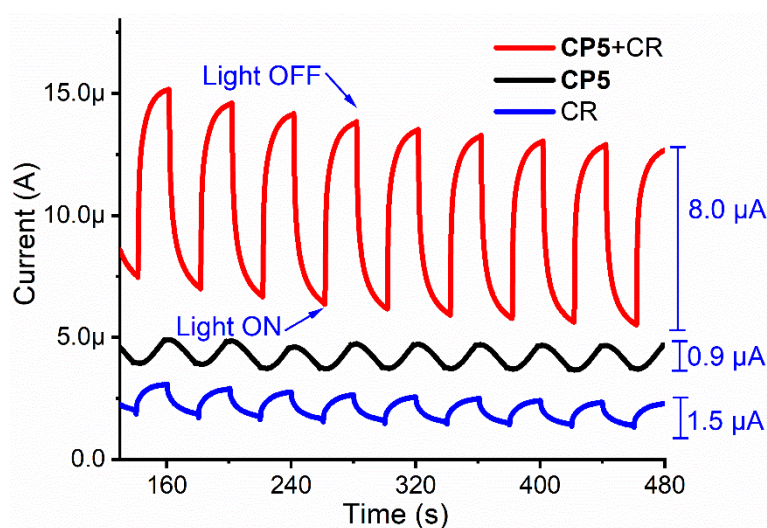

**Fig. S22** Photocurrent responses of CR, CP5 and CP5+CR coated on glassy carbon electrodes.

## References

- 1 A. J. Amoroso, A. Thompson, J. P. Maher, J. A. McCleverty and M. D. Ward, Dinucleating, trinucleating, and tetranucleating pyridyl ligands which facilitate multicenter magnetic exchange between paramagnetic molybdenum centers, *Inorg. Chem.*, 1995, **34**, 4828-4835.
- 2 G. M. Sheldrick, Crystal structure refinement with Shelxl, *Acta. Cryst. C.*, 2015, **71**, 3-8.
- 3 A. L. Spek, Single-crystal structure validation with the program PLATON, *J. Appl. Cryst.*, 2003, **36**, 7-13.
